# Supplementary material for: Keratinocyte-Immune Cell Crosstalk in a STAT1-Mediated Pathway: Novel Insights Into Rosacea Pathogenesis
Source: PubMed Central journal article supplement (PMC8287635; doi:10.3389/fimmu.2021.674871), 2021-07-05
Supplement: DataSheet_1.pdf [file DataSheet_1.pdf]

## Supplementary figures and figure legends

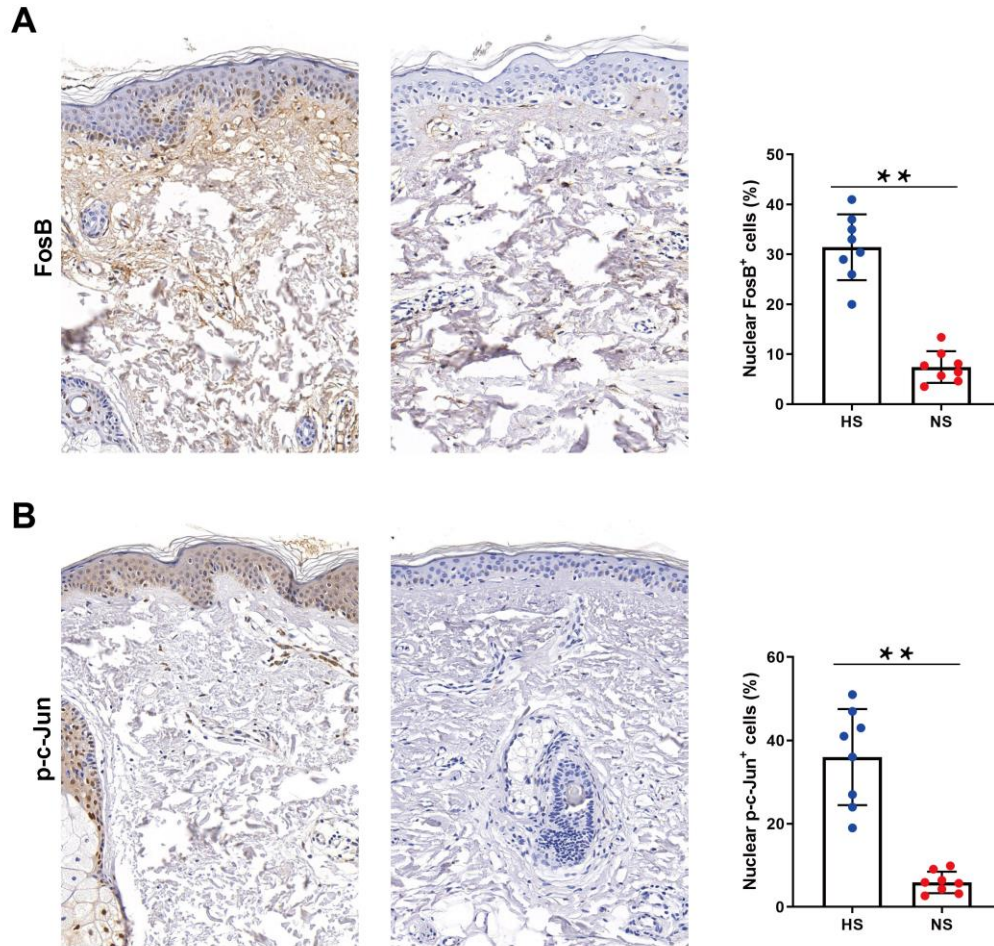

**Supplementary Figure S1. Transcription factors (TFs) related to transcriptional profiling in central facial skin.** Immunohistochemistry staining for validation of FosB and p-c-Jun. HS, healthy skin (n = 8). NS, normal skin surrounding the auricle in rosacea patients (n = 8). Right panel, the quantification of nuclear localization of FosB and p-c-Jun. Data represent the mean  $\pm$  SEM. \*\*P < 0.01. 2-tailed unpaired Student's t-test was used.

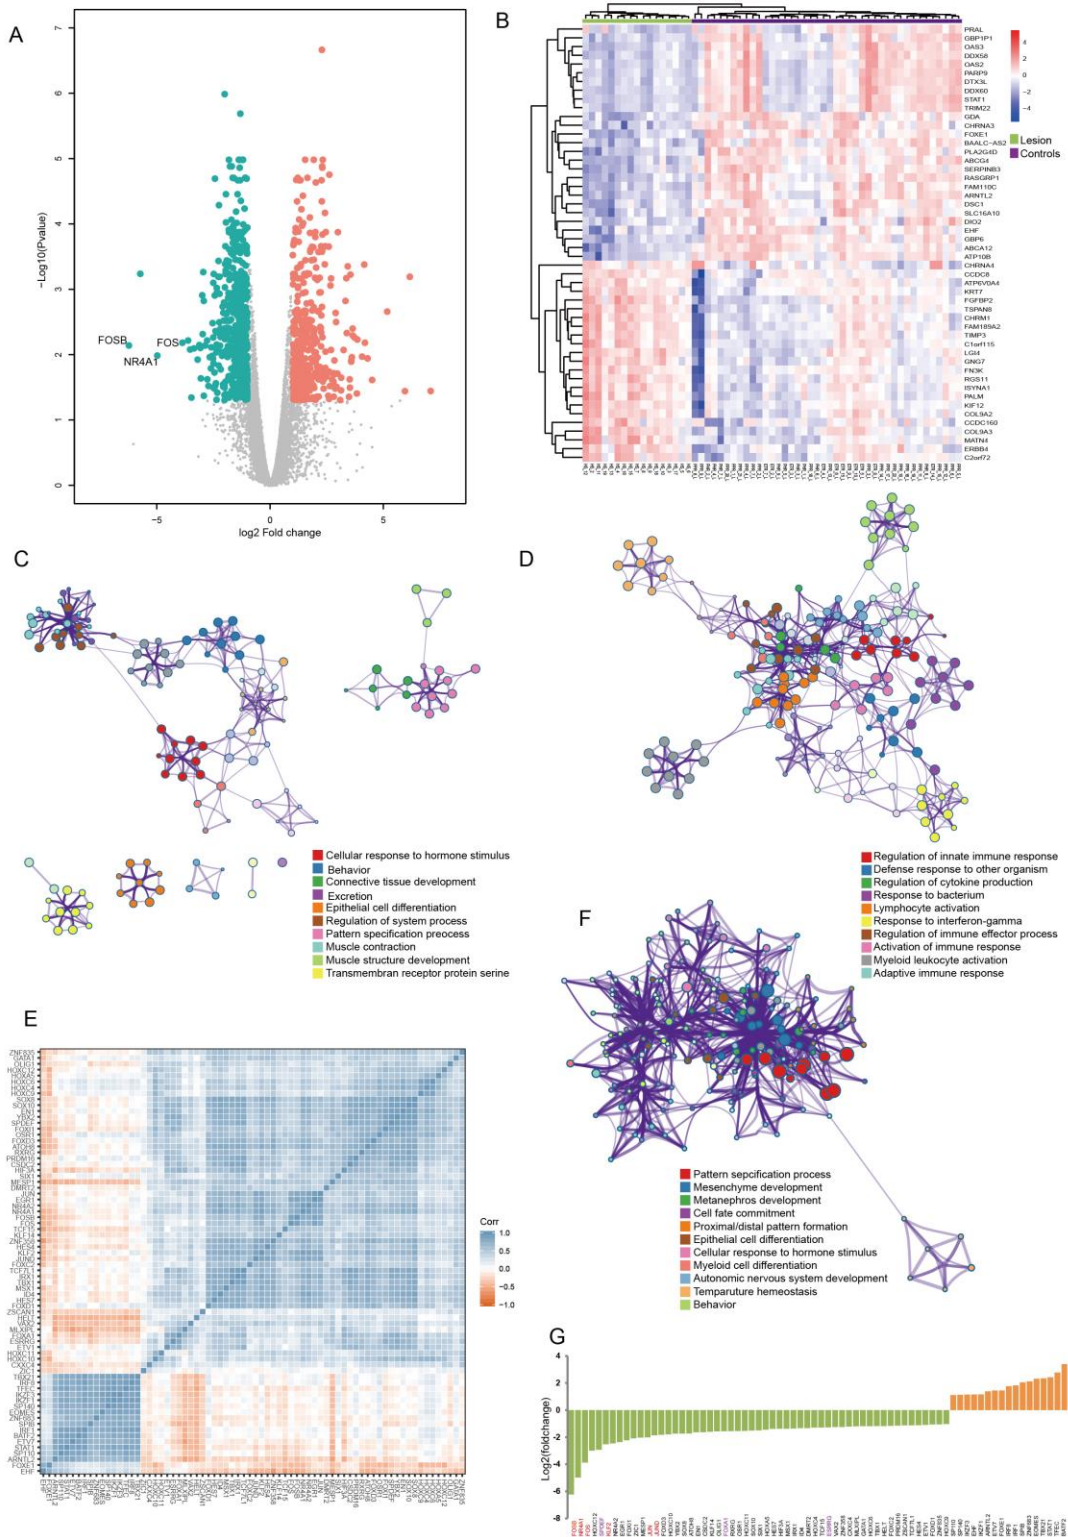

**Supplementary Figure S2. Transcriptional profiling in rosacea lesions as compared with central facial skins from health volunteers**

A. Volcano plot for the differentially expressed genes (DEGs) in rosacea lesions (LS, N=42) compared with central facial skins (HS N=17) from

healthy volunteers. The upregulated genes in rosacea lesions are in red and downregulated genes are in green. Genes without significant diversity are in gray.

- B. Heatmap generated using the top 50 DEGs in comparing LS vs HS.
- C. Metascape network analysis of intra-cluster redundancies and inter-cluster similarities of enriched GO terms and pathways for downregulated genes.
- D. Metascape network analysis of enriched GO terms and pathways for upregulated genes.
- E. Correlation heatmap of significant correlation for expression of all 72 transcription factors.
- F. Metascape network analysis of enriched GO terms and pathways for transcription factors.
- G. Log2 fold change values for the different expression of all 72 transcription factors with downregulated expression of AP1 TFs (FOS, FOSB, JUN, and JUND).



**Supplementary Figure S3. Transcriptional profiling in rosacea lesions as compared with matched skin surrounding the auricle**

- A. Volcano plot for the DEGs between rosacea lesions (LS) and matched skin surrounding the auricle (NS, N=42).
- B. Heatmap of the top 50 DEGs between rosacea lesions (purple color bar) and matched skin surrounding the auricles (green color bar).
- C. Metascape network analysis of GO terms and pathways enriched for downregulated genes, indicating genes involved in biological processes of skin development, neuroactive ligand-receptor interaction and chemical synaptic transmission.
- D. Metascape network analysis of the GO terms and pathways enriched for upregulated genes, mainly involved in biological processes of response to bacterium and metabolism of lipids.
- E. Correlation heatmap of significant correlation for expression of all 94 transcription factors.
- F. Metascape network analysis of transcription factors highlighting the pattern specification process.
- G. Log2 fold change values for the different expression of all 94 transcription factors.

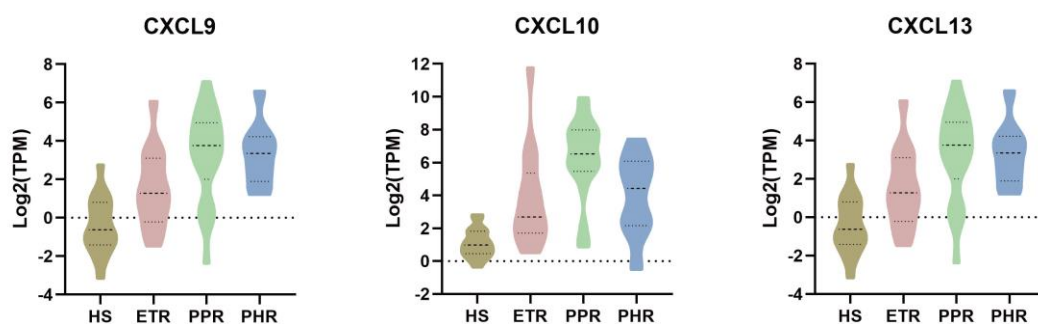

**Supplementary Figure S4. Violin plots showing CXCL9, CXCL10 and CXCL13 expression in rosacea lesions (LS, N=42) compared with central facial skins (HS N=17) from healthy volunteers.**

PHR

Rabbit IgG

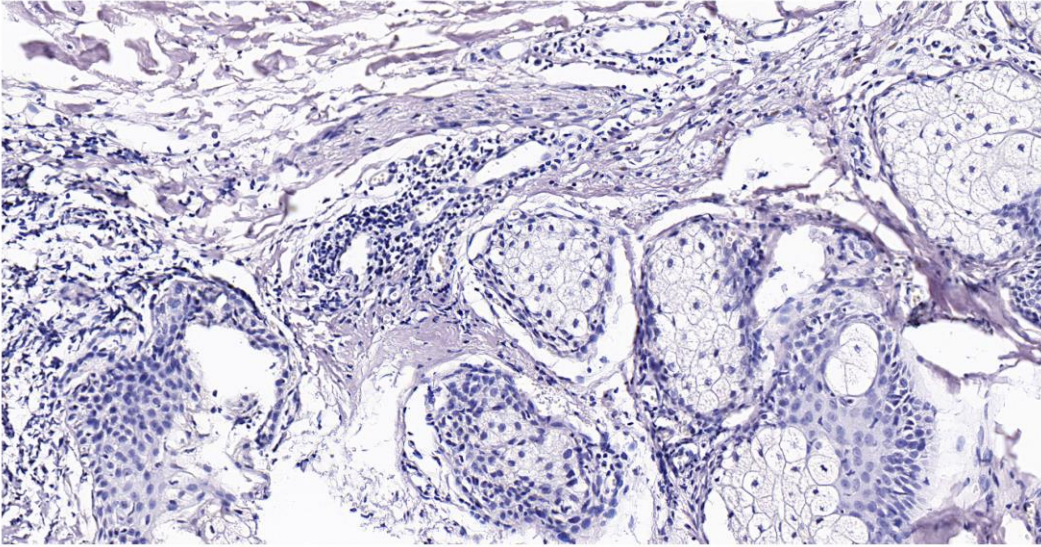

**Supplementary Figure S5. Immunohistochemistry staining for rabbit IgG in PHR skin lesion as the negative control.**
