# Supplementary material for: Keratinocyte-Immune Cell Crosstalk in a STAT1-Mediated Pathway: Novel Insights Into Rosacea Pathogenesis
Source: Front Immunol. 2021 Jul 5;12:674871. doi: 10.3389/fimmu.2021.674871 (PMC8287635; doi:10.3389/fimmu.2021.674871)
Supplement: Supplementary file 2 [file Table_1.xlsx]

## Sheet: immune response
Gene list for the GO term of immune response
Gene Name	FDR_HL	FC_HL	FDR_NL	FC_NL
DEFB4A	0.00064452	71.9536	6.65449e-08	73.5629
CXCL10	0.0362785	62.0258	0.00470696	19.7042
CXCL9	0.00219735	36.0829	0.000147271	11.6702
ADAMDEC1	0.0107347	16.7113	0.00294858	5.81445
CXCL13	0.0058796	14.4721	9.60715e-06	14.4065
FCGR1A	0.0128131	11.9884	9.60715e-06	13.4999
AIM2	0.000677083	10.3174	1.24718e-07	8.97043
FCGR3A	0.044043	7.01576	9.01717e-06	14.9297
CD274	0.0203515	6.99124	0.000269597	5.98115
OAS2	0.00024813	4.92105	1.21176e-07	4.06246
GBP6	2.17048e-07	4.88083	1.48299e-20	6.30989
GZMA	0.00112144	4.55101	1.45871e-06	3.89333
CTSS	0.0439451	4.1985	0.00354125	3.27784
OAS3	2.32084e-05	4.05332	6.51824e-09	3.08286
CCR5	0.00922358	4.05252	3.13488e-05	3.76968
CD8A	0.0093714	3.90675	0.000114052	3.18683
CCL5	0.00681928	3.88935	3.37707e-05	3.6102
CNR2	0.0296003	3.77273	6.42828e-07	6.46507
TLR10	0.00160018	3.48741	9.27682e-07	3.13306
ACKR2	0.0161466	3.41886	9.14194e-07	4.58927
TRIM22	7.97639e-05	3.38411	2.43498e-08	2.69137
IRF8	0.0354168	3.37532	0.000217809	3.47161
IL2RA	0.0475867	3.24292	0.00598489	2.47737
IL18RAP	0.0206404	3.22031	0.000415373	2.73399
CD8B	0.0186797	3.17211	0.000799582	2.58632
GBP2	0.000612926	3.00307	3.34993e-05	2.07582
TRGC2	0.0186966	2.96946	8.74984e-05	2.8864
GPR65	0.0114358	2.93086	7.45684e-06	3.22319
LCP2	0.0243254	2.92034	0.000240716	2.7486
GZMH	0.0353461	2.87014	0.00029251	3.08775
CIITA	0.00230919	2.80403	5.68184e-06	2.42259
HRH2	0.0165464	2.7784	4.81399e-07	3.706
FCGR3B	0.016965	2.67726	5.95979e-06	2.86429
HLA-DRA	0.0365635	2.57274	0.00161613	2.27274
SERPINB9	0.00658703	2.38508	2.12632e-07	2.79191
FCGR2C	0.0270268	2.36592	0.000279474	2.17374
PTAFR	0.0141659	2.32978	1.92542e-05	2.37991
TNFSF8	0.0457519	2.09249	3.48899e-05	2.46342
TLR2	0.0238462	2.08254	6.72674e-10	3.40259
Rosacea lesions campared with matched normal skin surrounding the auricle (LS vs NS) and central facial skin from healthy controls (LS vs HS).
HL: LS vs HS; NL: LS vs NS.
